# Supplementary material
Source: ML conference proceedings conference paper supplement (https://aclanthology.org/2025.bionlp-1.13)
Supplement: SupplementaryMaterial [file 2025.bionlp-1.13.SupplementaryMaterial.zip]

## Base cross-encoder

## Parallel cross-encoder

## Multi cross-encoder

**MET** amplification may predict survival in **CRC**.  
[SEP] **MET** [MASK] methionine

...

**MET** amplification may predict survival in **CRC**.  
[SEP] **MET** [MASK] c-MET gene

**MET** amplification may predict survival in **CRC**.  
[SEP] **CRC** [MASK] CRC checksum

...

**MET** amplification may predict survival in **CRC**.  
[SEP] **CRC** [MASK] chronic refractory cough

**MET** amplification may predict survival in **CRC**.

[SEP] **MET** [MASK] methionine  
[SEP] **MET** [MASK] metencephalon  
[SEP] **MET** [MASK] c-MET gene

**MET** amplification may predict survival in **CRC**.

[SEP] **CRC** [MASK] CRC checksum  
[SEP] **CRC** [MASK] colorectal cancer  
[SEP] **CRC** [MASK] chronic refractory cough

**MET** amplification may predict survival in **CRC**.

[SEP] **MET** [MASK] methionine  
[SEP] **MET** [MASK] metencephalon  
[SEP] **MET** [MASK] c-MET gene  
[SEP] **CRC** [MASK] CRC checksum  
[SEP] **CRC** [MASK] colorectal cancer  
[SEP] **CRC** [MASK] chronic refractory cough
