# Supplementary material
Source: ML conference proceedings conference paper supplement (https://aclanthology.org/2025.bionlp-1.13)
Supplement: SupplementaryMaterial [file 2025.bionlp-1.13.SupplementaryMaterial.zip]

**TEXT**

**MET** amplification may predict survival  
in **CRC**.

**ENTITY 1**

MET

Candidate  
retrieval

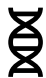

methionine

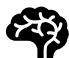

metencephalon

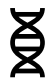

c-MET gene

**ENTITY 2**

CRC

Candidate  
retrieval

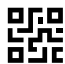

CRC checksum

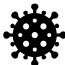

colorectal cancer

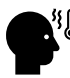

chronic refractory  
cough

Multi cross-encoder  
reranker

**ENTITY 1**

c-MET gene

**ENTITY 2**

Colorectal cancer
