# Supplementary material
Source: ML conference proceedings conference paper supplement (https://aclanthology.org/2025.bionlp-1.13)

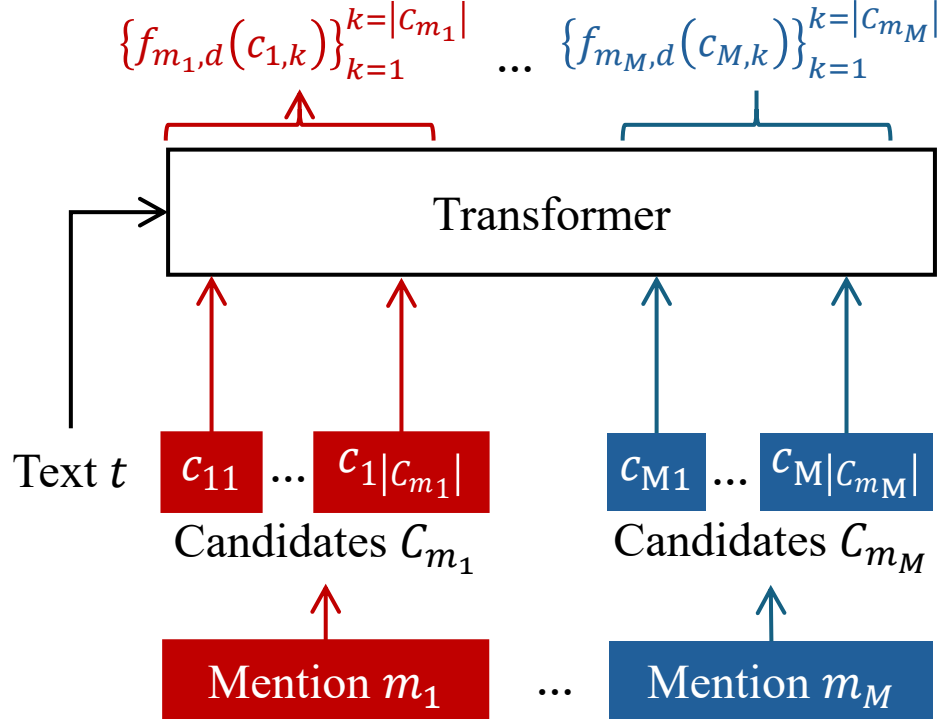

Supplement: SupplementaryMaterial [file 2025.bionlp-1.13.SupplementaryMaterial.zip]

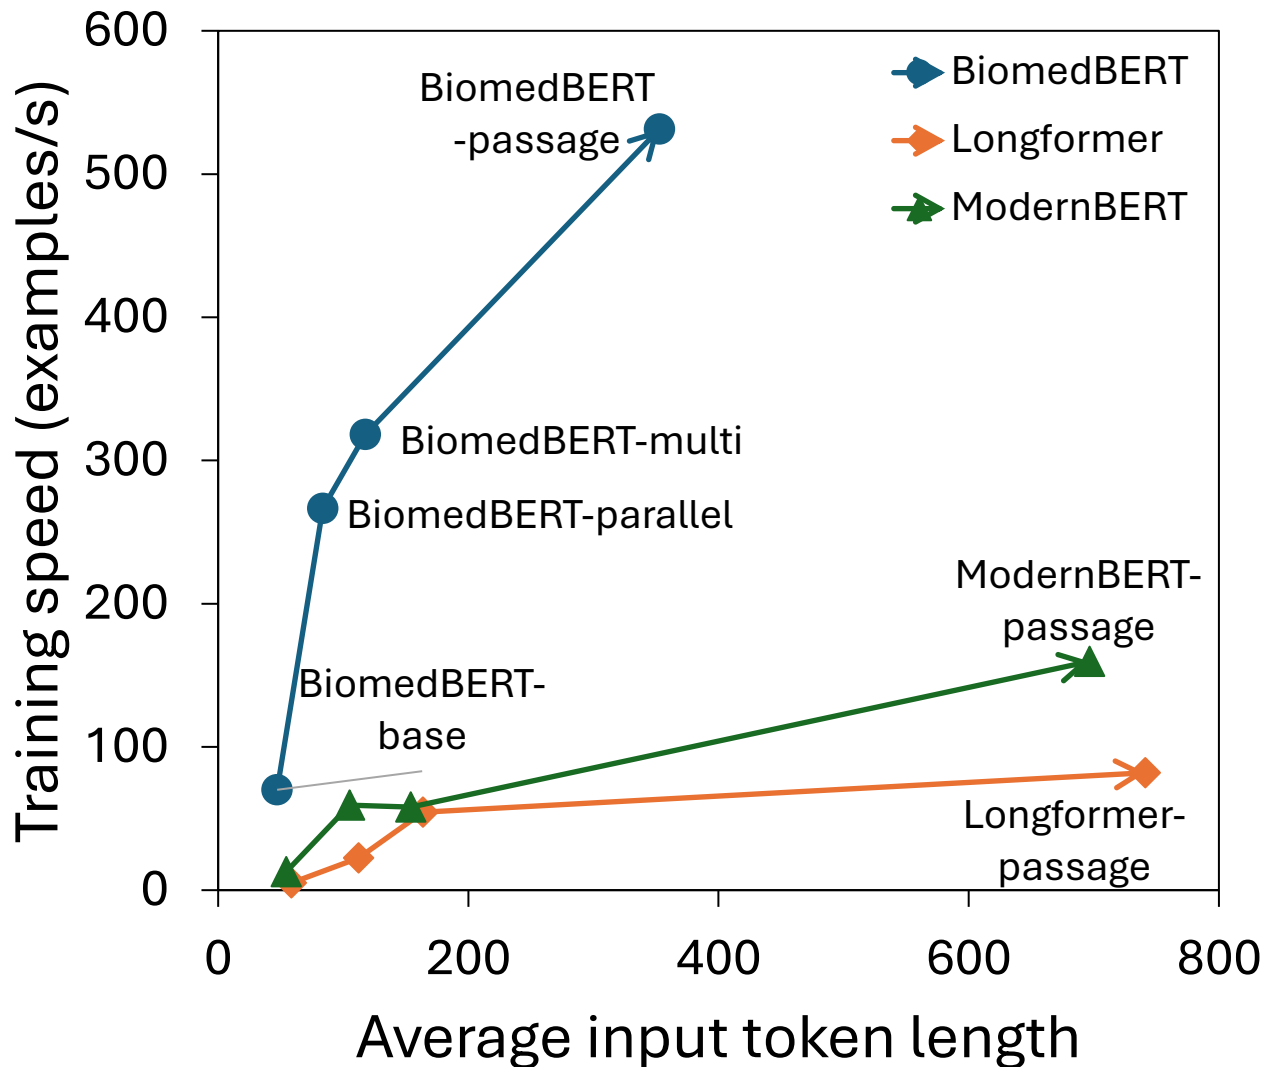

Supplement: SupplementaryMaterial [file 2025.bionlp-1.13.SupplementaryMaterial.zip]

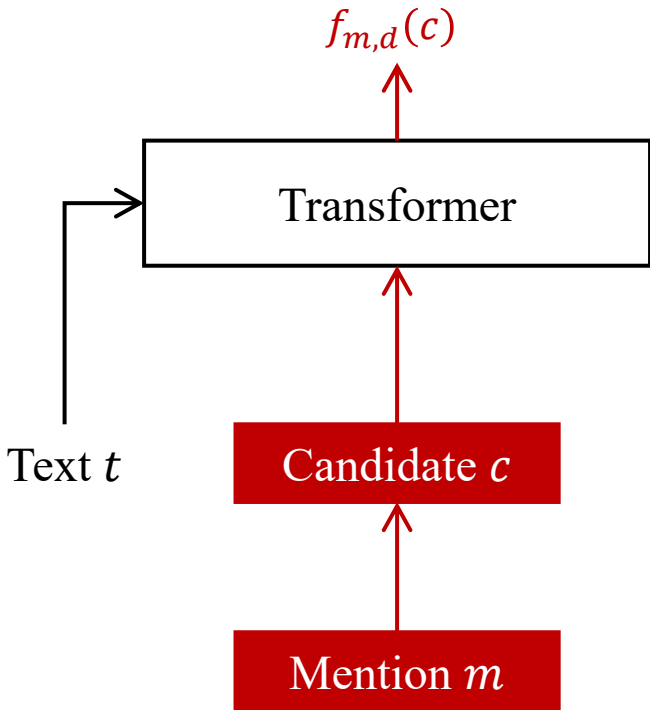

Supplement: SupplementaryMaterial [file 2025.bionlp-1.13.SupplementaryMaterial.zip]

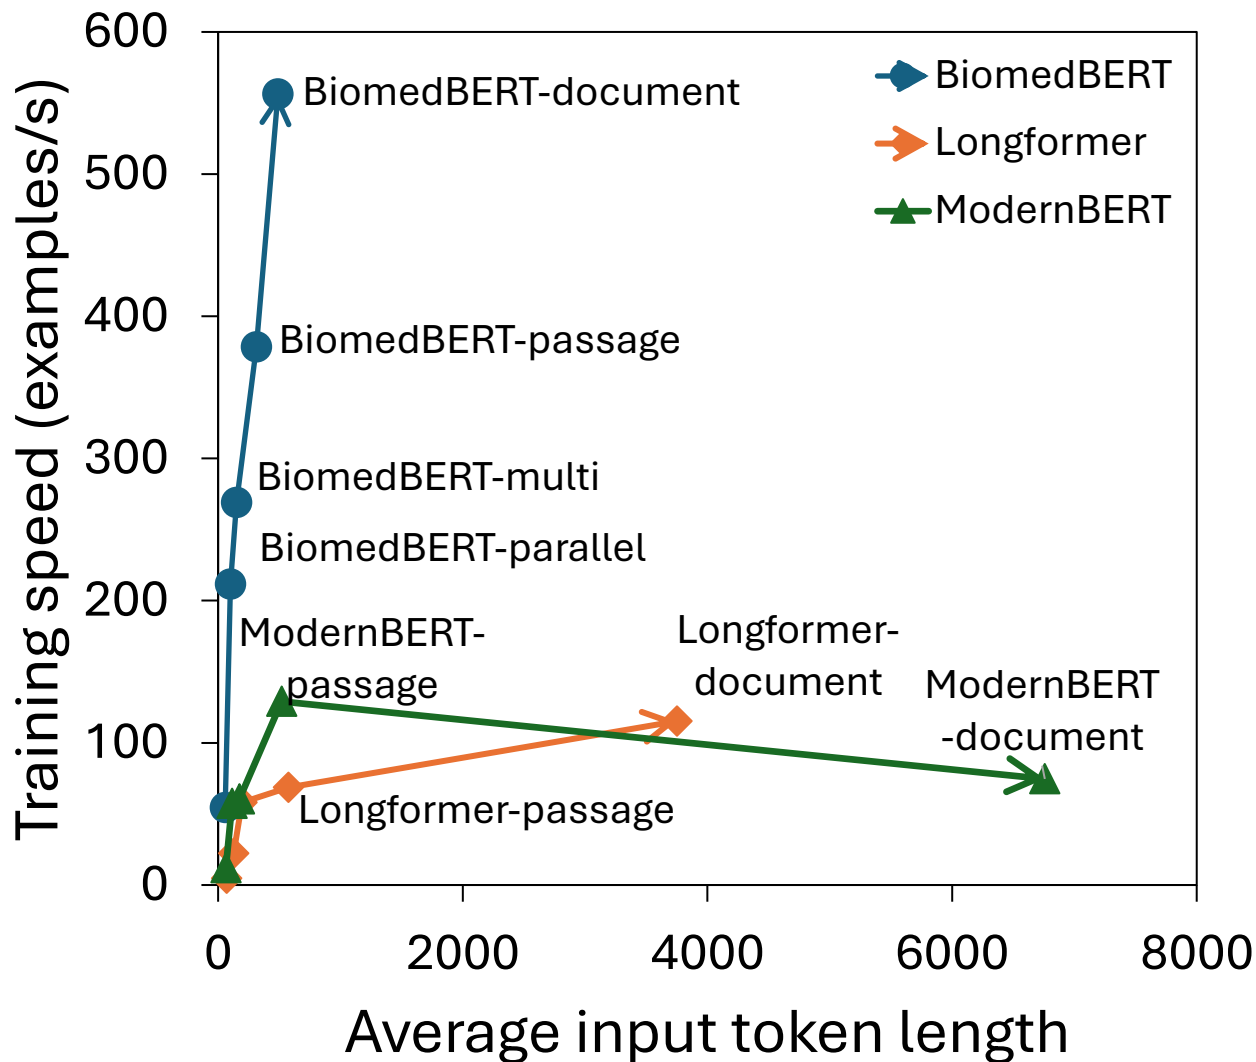

Supplement: SupplementaryMaterial [file 2025.bionlp-1.13.SupplementaryMaterial.zip]

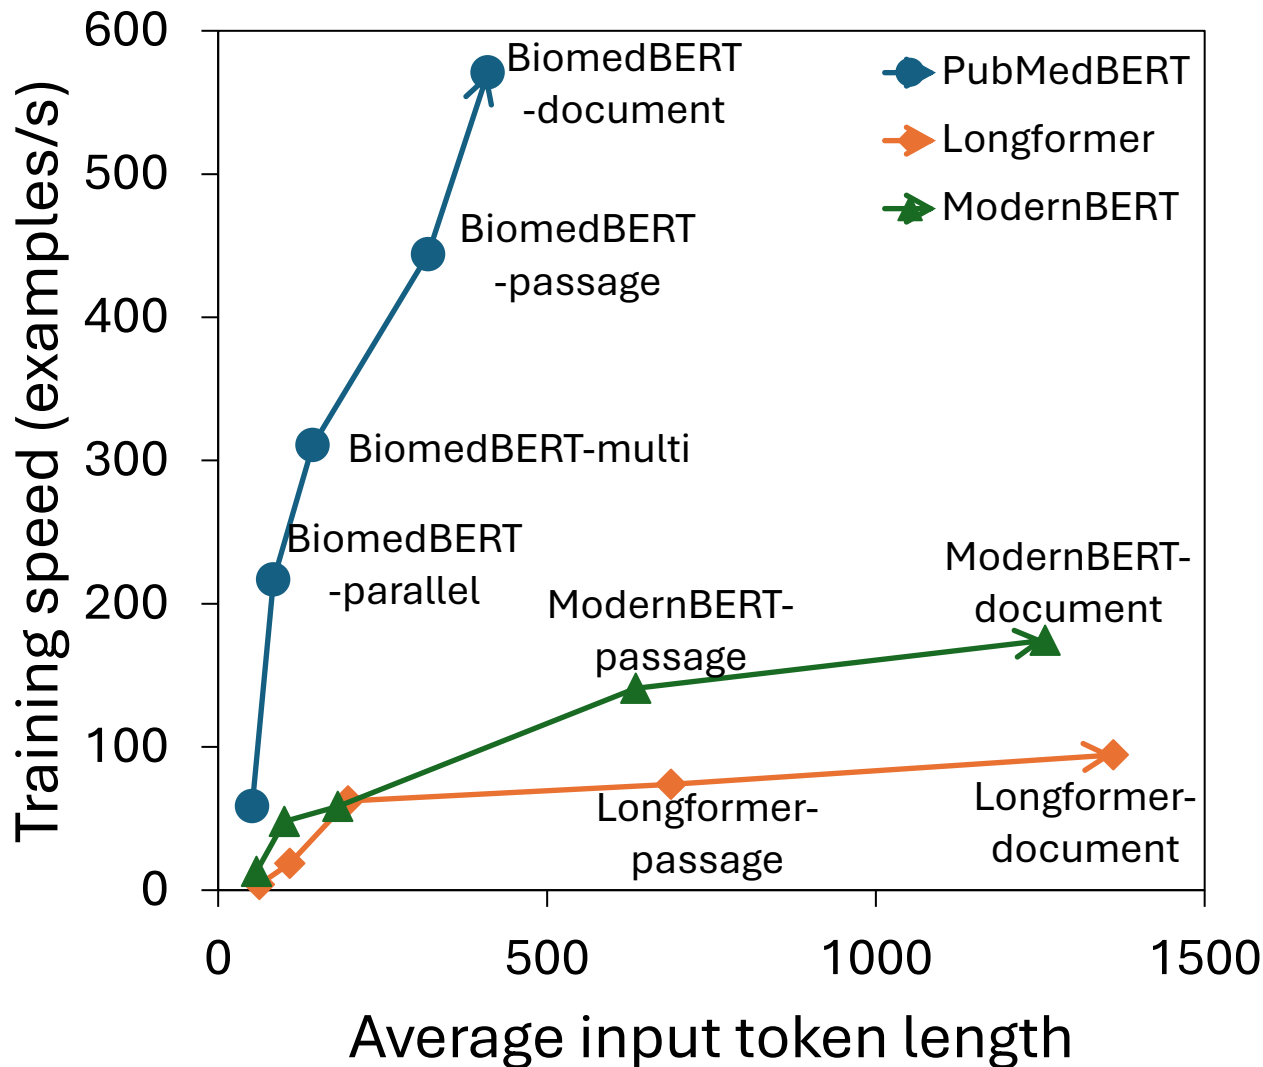

Supplement: SupplementaryMaterial [file 2025.bionlp-1.13.SupplementaryMaterial.zip]

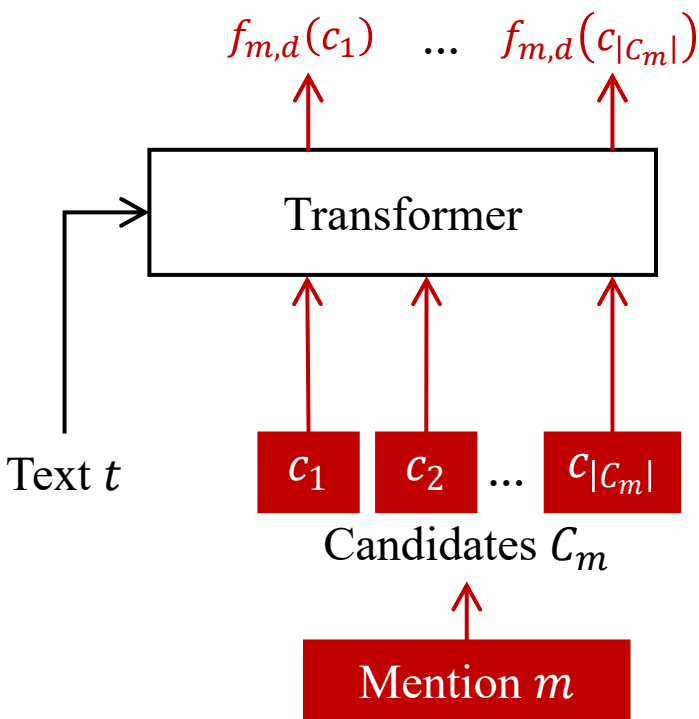

Supplement: SupplementaryMaterial [file 2025.bionlp-1.13.SupplementaryMaterial.zip]

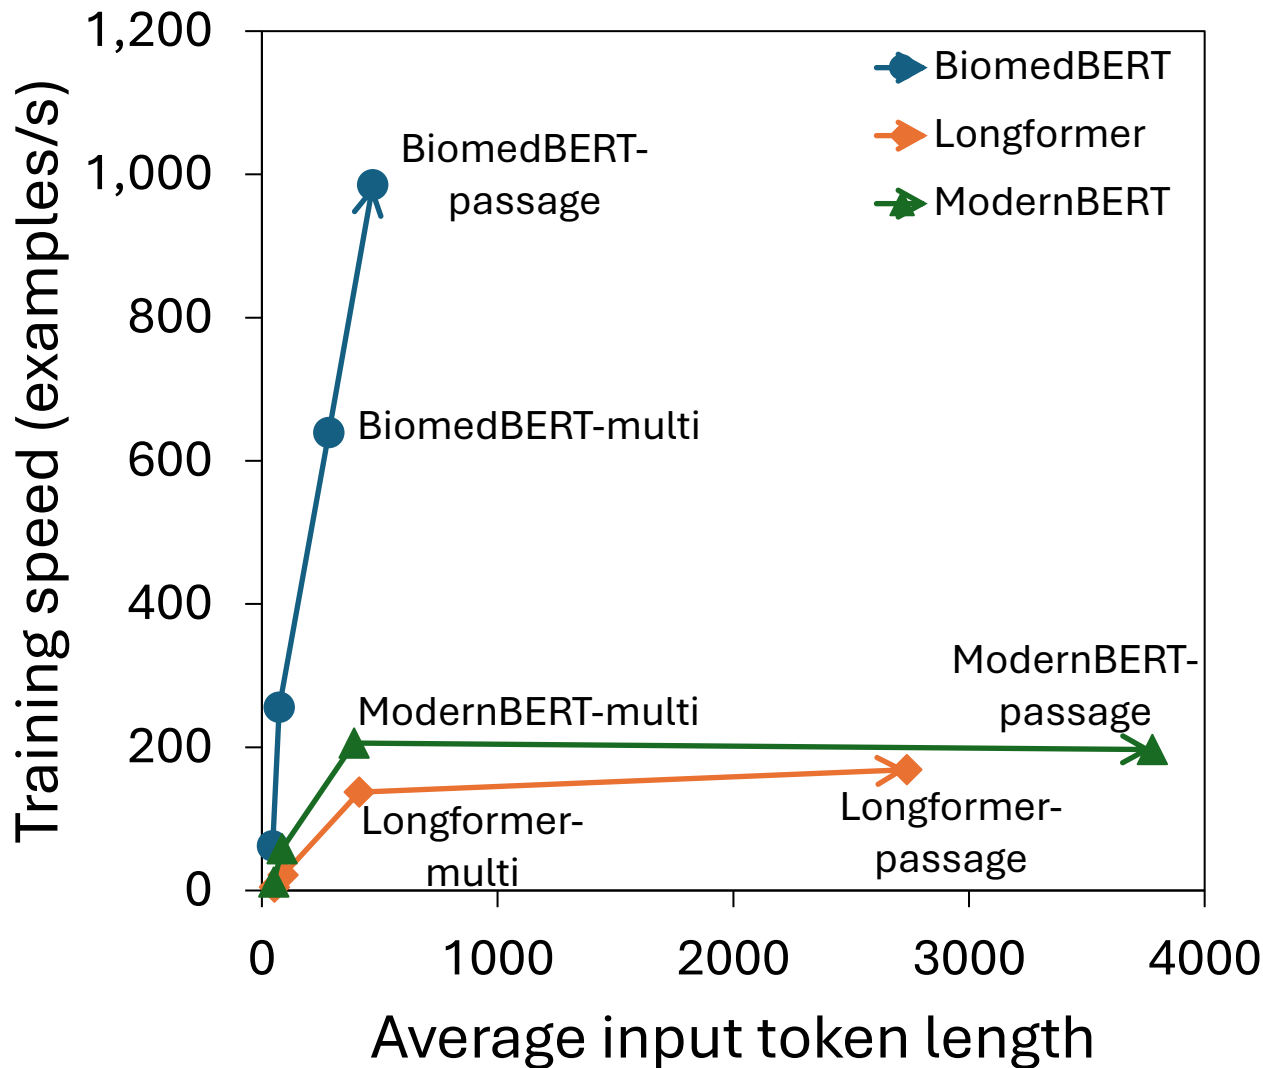

Supplement: SupplementaryMaterial [file 2025.bionlp-1.13.SupplementaryMaterial.zip]

$$\tau(t, \mathcal{M}_t)$$

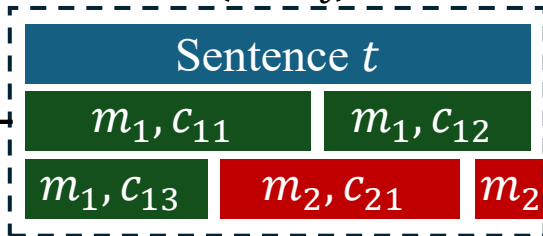

$$\tau_1(t, \mathcal{M}_t)$$

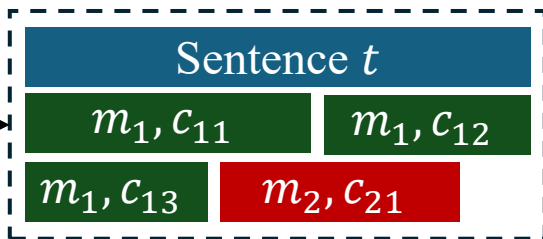

$$\tau_2(t, \mathcal{M}_t)$$

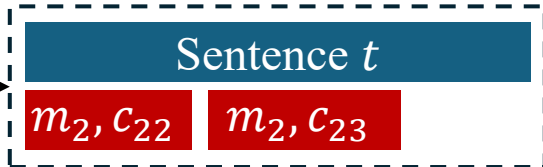

Supplement: SupplementaryMaterial [file 2025.bionlp-1.13.SupplementaryMaterial.zip]

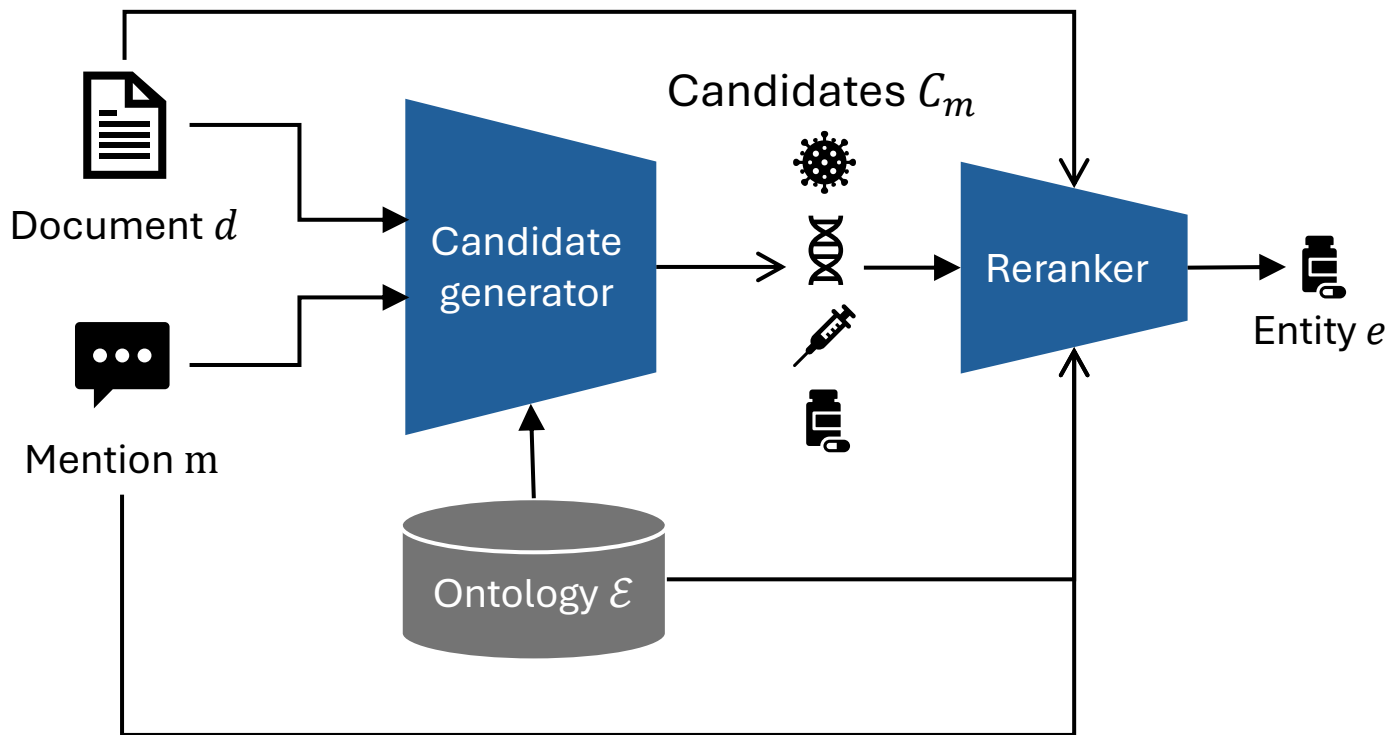

Supplement: SupplementaryMaterial [file 2025.bionlp-1.13.SupplementaryMaterial.zip]
